# Supplementary material for: (CTG)n repeat-mediated dysregulation of MBNL1 and MBNL2 expression during myogenesis in DM1 occurs already at the myoblast stage
Source: PubMed Central journal article supplement (PMC6530876; doi:10.1371/journal.pone.0217317), 2019-05-22
Supplement: pone.0217317.s002.pdf [file pone.0217317.s002.pdf]

## Supporting Information Table S1 – Primers used in this study

André et al., (CTG)<sub>n</sub> repeat-mediated dysregulation of MBNL1 and MBNL2 expression during myogenesis in DM1 occurs already at the myoblast stage.

| Gene         | Purpose <sup>a</sup> | Sequence <sup>b</sup>                                             | Product size(s) (bp) |
|--------------|----------------------|-------------------------------------------------------------------|----------------------|
| <i>MBNL1</i> | RT-qPCR              | Ex1_Fw: GCTGTTAGTGTACACCAATTCG<br>Ex1_Rv: AGGCGATTACTCGTCCATTTTC  | 154                  |
| <i>MBNL1</i> | Alternative splicing | Ex4_Fw: GGCTGCCCAATACCAGGTCA<br>Ex10_Rv: CTTGTGGCTAGTCAGATGTTCCGG | 470/434/416/380      |
| <i>MBNL2</i> | RT-qPCR              | Ex1_Fw: TCAAAGAGGAACATGCTCACG<br>Ex2_Rv: AACGGCCCTTAGGGAATCAA     | 116                  |
| <i>MBNL2</i> | Alternative splicing | Ex4_Fw: TTTTCACCCTCCTGCACACT<br>Ex9_Rv: GTTATTCTCAATGCAGATTCTTGCC | 470/416/375/321      |
| <i>MBNL3</i> | RT-qPCR              | Ex7_Fw: CAATACTGTGCATGGCACCCG<br>Ex8_Rv: GGTGGCAGGTGTTGTTGCTG     | 92                   |
| <i>GAPDH</i> | RT-qPCR              | Fw: CCCGCTTCGCTCTCTGCTCC<br>Rv: CCTTCCCATGGTGTCTGAGCG             | 94                   |
| <i>HPRT1</i> | RT-qPCR              | Fw: TGACACTGGCAAACAATGCA<br>Rv: GGTCCTTTTACCAGCAAGCT              | 94                   |

<sup>a</sup> RT-qPCR = quantitative RT-PCR to measure transcript levels; Alternative splicing = semi-quantitative RT-PCR to identify splice variants

<sup>b</sup> Fw = forward primer, Rv = reverse primer; all in 5' -> 3' direction
