# Supplementary material for: (CTG)n repeat-mediated dysregulation of MBNL1 and MBNL2 expression during myogenesis in DM1 occurs already at the myoblast stage
Source: PubMed Central journal article supplement (PMC6530876; doi:10.1371/journal.pone.0217317), 2019-05-22
Supplement: pone.0217317.s003.pdf [file pone.0217317.s003.pdf]

## Supporting Information Table S2 – Antibodies used in this study

André et al., (CTG)<sub>n</sub> repeat-mediated dysregulation of MBNL1 and MBNL2 expression during myogenesis in DM1 occurs already at the myoblast stage.

| Protein   | Company and antibody description                                                                                                                                                                                                                    | Dilution |
|-----------|-----------------------------------------------------------------------------------------------------------------------------------------------------------------------------------------------------------------------------------------------------|----------|
| MBNL1     | Developmental Studies Hybridoma Bank, MB1a (4A8), recognizing the linker region between the two zinc finger domains in MBNL1 encoded by exon 3 [33]. Exon 3 was present in >97% of the MBNL1 mRNAs in our cells (data not shown). Mouse monoclonal. | 1:100    |
| MBNL2     | Developmental Studies Hybridoma Bank, MB2a (3B4), recognizing the N-terminal sequence shared by all MBNL2 splice variants [33].<br>Mouse monoclonal.                                                                                                | 1:100    |
| β-Tubulin | Developmental Studies Hybridoma Bank (E7). Mouse monoclonal.                                                                                                                                                                                        | 1:5000   |
| MHC       | Developmental Studies Hybridoma Bank (MF-20). Mouse monoclonal.                                                                                                                                                                                     | 1:100    |
| Lamin A/C | Abcam (ab40567). Mouse monoclonal.                                                                                                                                                                                                                  | 1:500    |
